# Supplementary material
Source: PubMed Central journal article supplement (PMC6157274)
Supplement: NIHMS965949-supplement-supplement_1.pdf [file NIHMS965949-supplement-supplement_1.pdf]

Copyright WILEY-VCH Verlag GmbH & Co. KGaA, 69469 Weinheim, Germany,  
2016.

## Supporting information

### Nanoparticle-based fluoroionophore for analysis of potassium ion dynamics in 3D tissue models and *in vivo*

*Bernhard J. Mueller<sup>1,§</sup>, Alexander V. Zhdanov<sup>2,§</sup>, Sergey M. Borisov<sup>1</sup>, Tara Foley<sup>3</sup>,  
Irina A. Okkelman<sup>2</sup>, Vassiliy Tsytsarev<sup>4</sup>, Qinggong Tang<sup>5</sup>, Reha S. Erzurumlu<sup>4</sup>, Yu  
Chen<sup>5</sup>, Haijiang Zhang<sup>6</sup>, Claudio Toncelli<sup>6</sup>, Ingo Klimant<sup>1</sup>, Dmitri B. Papkovsky<sup>2</sup>,  
Ruslan I. Dmitriev<sup>2\*</sup>*

Supplementary figures S1-S10

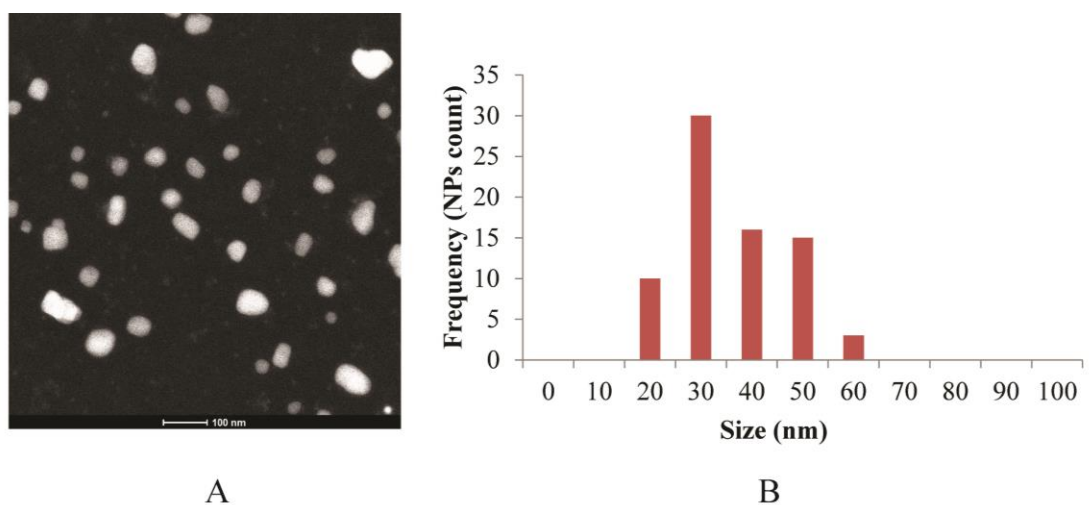

**Figure S1. Analysis of size of FI3 nanoparticles by electron microscopy.** STEM images of FI3 nanoparticles (scale bar 100 nm) Size distribution histogram is shown on the right.

A

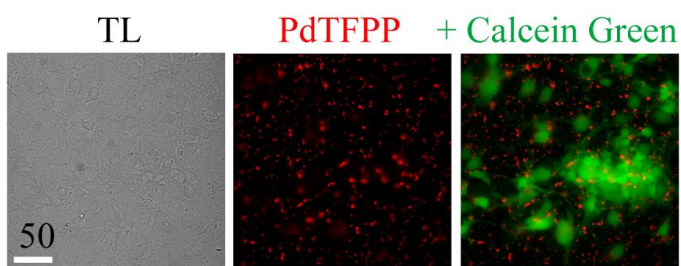

B

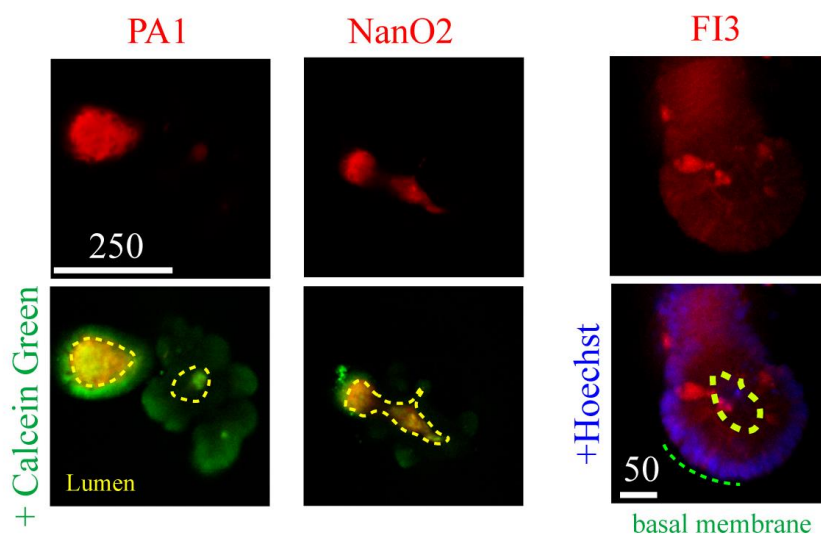

**Figure S2. Poor efficiency of staining of primary neurons and intestinal organoids with conventional RL100-based nanosensors.** A: staining of primary neurons with PdTFPP/RL100 nanoparticles (10  $\mu\text{g}/\text{ml}$ , 16 h), counter-stained with Calcein Green. B: Staining of mouse intestinal organoids with PA1 and NanO2 (10  $\mu\text{g}/\text{ml}$ , 16 h), counter-stained with Calcein Green or Hoechst 33342 and FI3, for comparison. Scale bar is in  $\mu\text{m}$ .

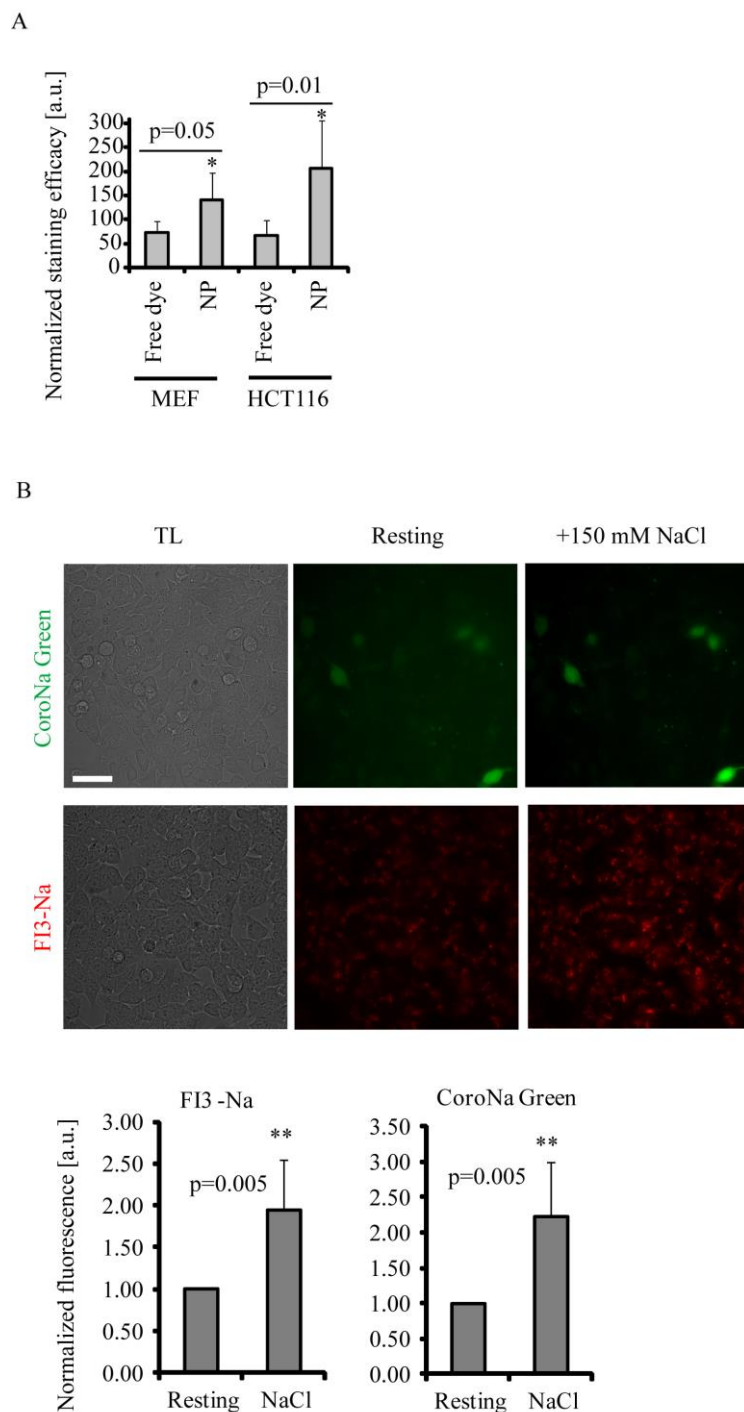

**Figure S3. Comparison of staining efficacy with different cell lines and  $\text{Na}^+$ -sensitivity of FI3-Na in cells.** A: Average staining efficacy of HCT116 and MEF cells with free ( $0.1 \mu\text{M}$ ) and encapsulated in nanoparticles ( $10 \mu\text{g/ml}$ ) FI3. Cells were incubated with dye and dye/NP at indicated concentrations (16 h), washed, imaged and quantified. B: Comparison of FI3-Na with another  $\text{Na}^+$  indicator CoroNa Green in HCT116 cells. Cells were stained either with CoroNa Green-AM ( $4 \mu\text{M}$ , 0.5 h) or FI3 nanoparticles ( $10 \mu\text{g/ml}$ ) and measured live at rest or after adding 150 mM NaCl (total  $\sim 0.3 \text{ M}$  final concentration in medium). Normalized responses in fluorescence are shown below.  $N=3$ . Scale bar is  $50 \mu\text{m}$ .

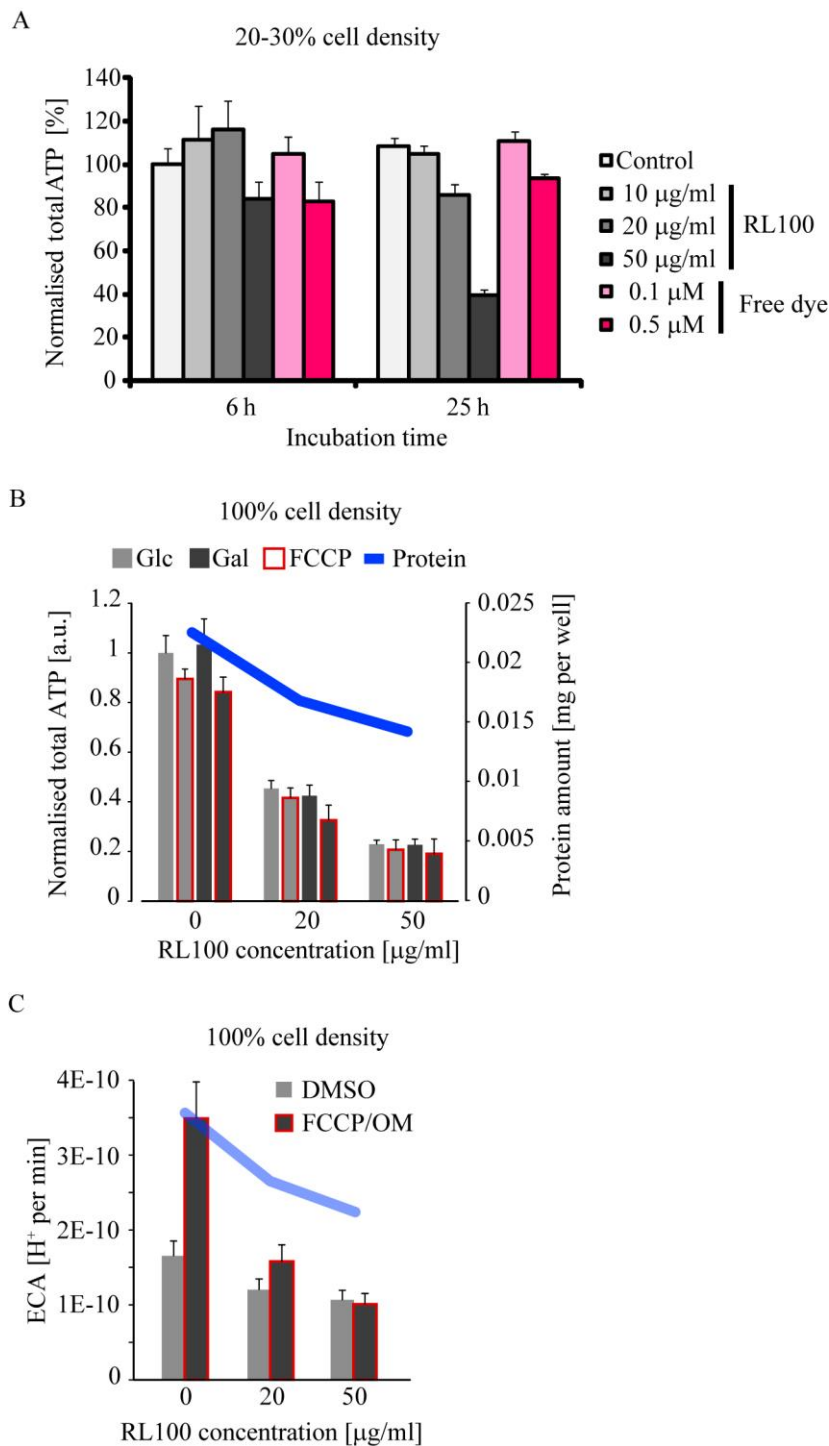

**Figure S4. Evaluation of toxicity of FI3 nanoparticles with primary neural cells.** Cells were grown on microplates, stained with FI3 at indicated concentration and times and then proceeded to analysis of cell energy budget by measuring total ATP and extracellular acidification. A: Total cellular ATP in cells cultured at regular 20-30% density. ATP data are normalized to total protein. B, C: Cells growing at high density and exposed to higher concentrations of FI3 and incubation in glucose- or galactose-containing media display stronger decrease of viability after treatment. B: Total cellular ATP. Blue line indicate total protein amount in the samples. C: Extracellular acidification (glycolytic flux). To achieve maximal uncoupling, cells were treated with 1 µM FCCP and 10 µM oligomycin (FCCP/OM). Error bars indicate standard deviation (N=4).

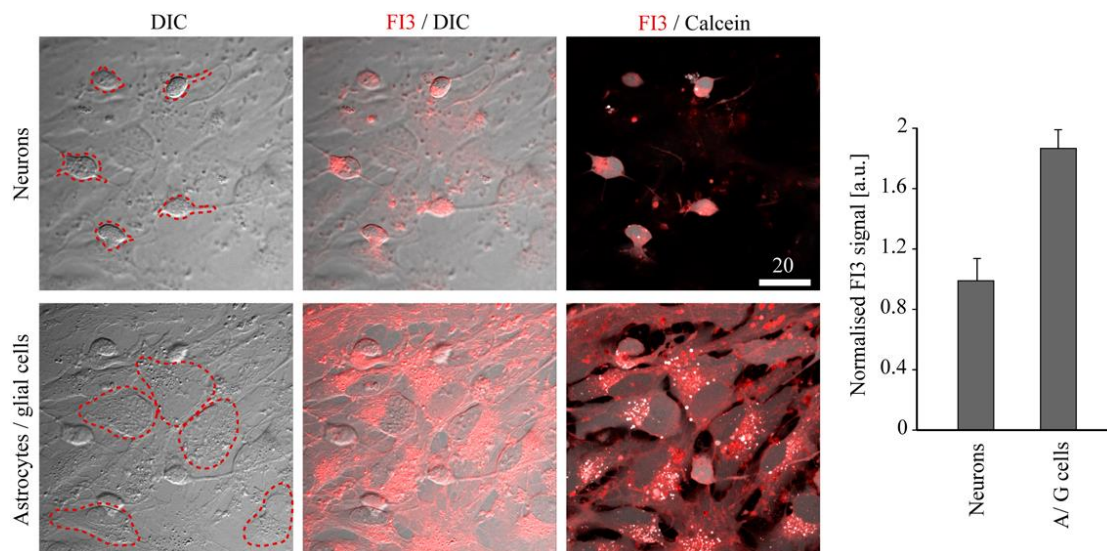

**Figure S5. Comparison of cell staining with FI3 nanoparticles between neurons and astro-glial cells.** The live cells were stained with FI3 (10  $\mu\text{g/ml}$ , 16 h), counter-stained with Calcein Green and imaged. Representative neurons (top) and astro-glial cell (bottom) are highlighted on transmission light (DIC) and combined fluorescence images. FI3 is shown in red, Calcein Green is shown in grayscale. For calculations, 4 confocal planes (0.5  $\mu\text{m}$  each) were stacked together. N = 8 (neurons) and 21 astro-glial cells. In the right panel, the calculated data are shown as  $m \pm \text{SEM}$ . Scale bar is in  $\mu\text{m}$ .

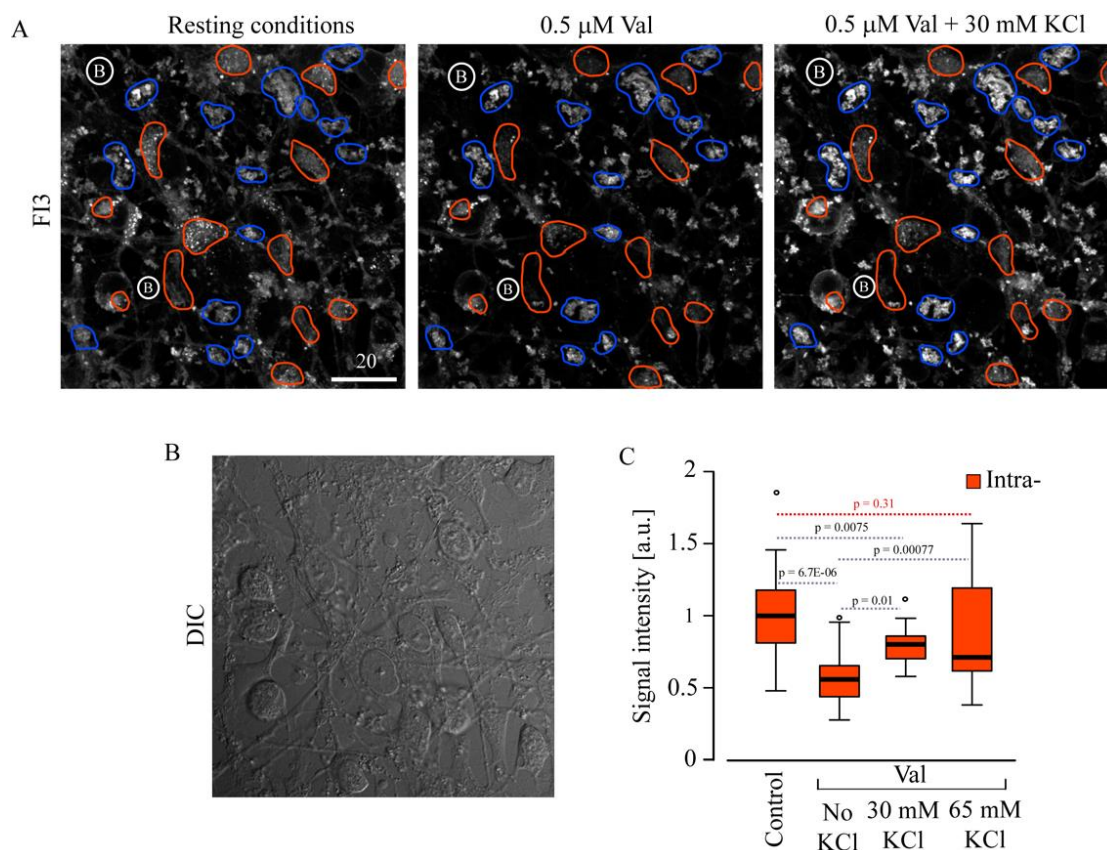

**Figure S6. Stimulation of rat primary neural cells with Valinomycin and KCl.** The live cells were stained with FI3 nanoparticles (10  $\mu\text{g/ml}$ , 16 h) and treated sequentially with valinomycin (Val) and KCl (at different concentrations). A: Fluorescence microscopy images of resting and treated cells (8 confocal planes taken with 0.5  $\mu\text{m}$  step). ROI are highlighted by red (intracellular) and blue (extracellular)

colour. B: DIC image (a single plane). C. Calculated responses of intracellular FI3 nanoparticles to the treatment; p values are shown (U test); red-colored p value shows non-significant difference in FI3 fluorescence between cells at rest and upon treatment with high KCl in the presence of Val. N= 3. Scale bar is in  $\mu\text{m}$ .

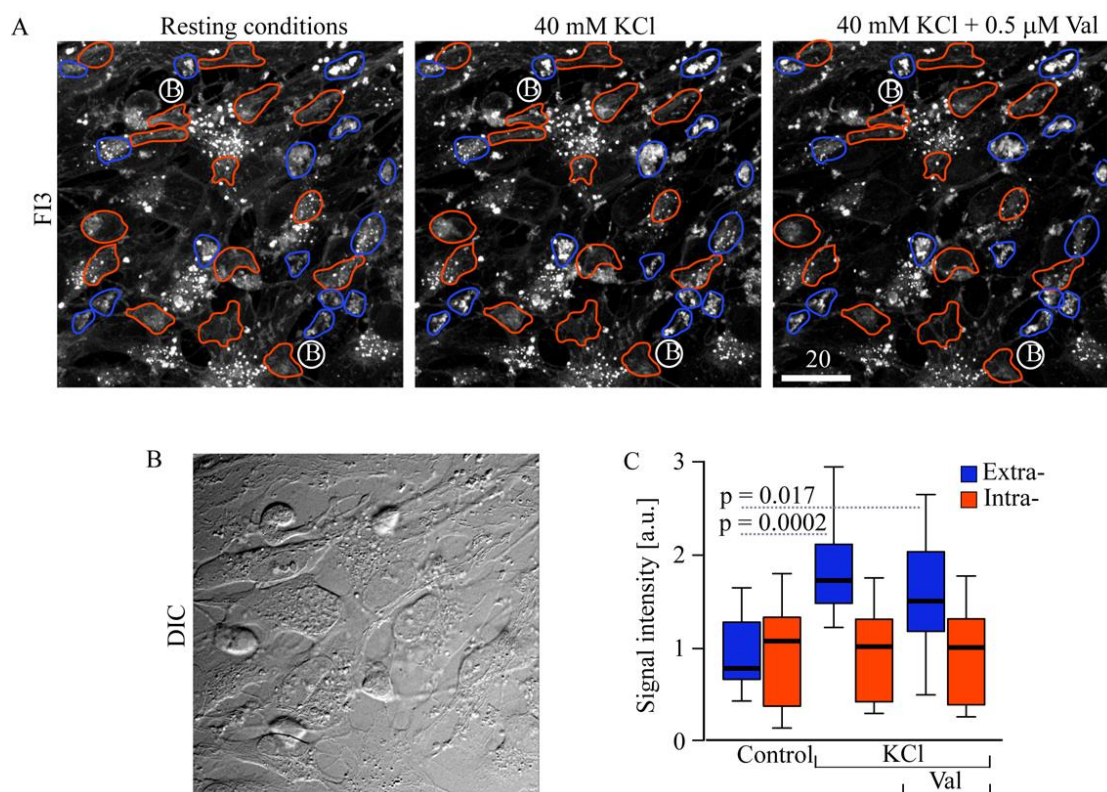

**Figure S7. Stimulation of rat primary neural cells with KCl and Valinomycin.**

The live cells were stained with FI3 nanoparticles (10  $\mu\text{g}/\text{ml}$ , 16 h) and treated sequentially with KCl and valinomycin (Val). A: Fluorescence microscopy images of resting and treated cells (8 confocal planes taken with 0.5  $\mu\text{m}$  step). ROI are highlighted by red (intracellular) and blue (extracellular) color. B: DIC image (a single plane). C. Calculated responses of intra- and extracellularly located FI3 nanoparticles to the treatment; p values are shown (U test). N= 3. Scale bar is in  $\mu\text{m}$ .

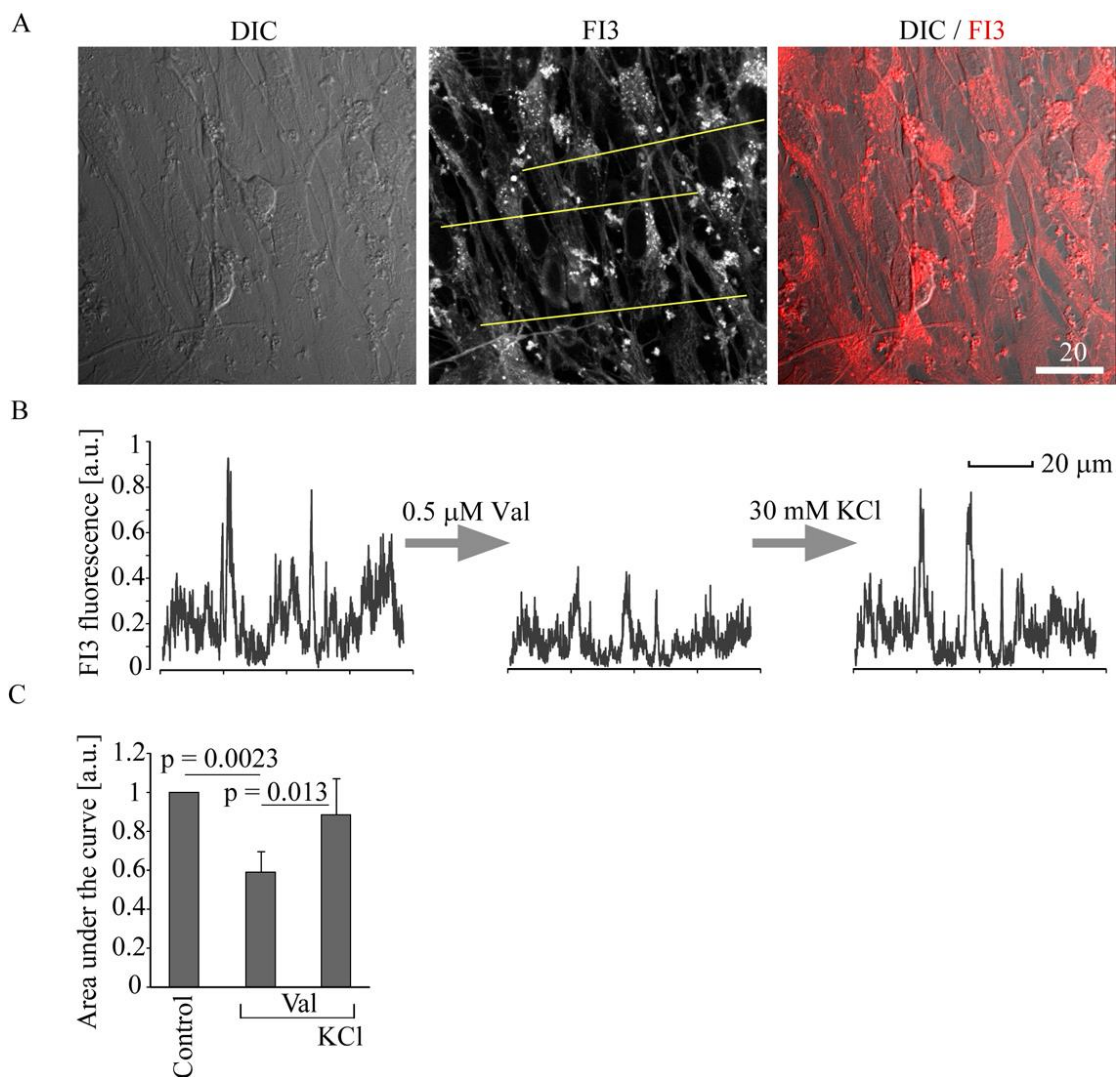

**Figure S8. Stimulation of rat primary neural cells with Valinomycin and KCl.** The live cells were stained with FI3 nanoparticles (10  $\mu\text{g}/\text{ml}$ , 16 h) and treated with valinomycin (Val) and KCl as indicated. A: DIC (a single plane) and fluorescence microscopy images (8 confocal planes taken with 0.5  $\mu\text{m}$  step). B: Line profile analysis of the changes in FI3 fluorescence, induced by treatments and (C) calculated responses in intracellular  $\text{K}^+$ . Error bars show SEM. Asterisks demonstrate significant difference ( $p < 0.01$ , U test).  $N = 3$ . Scale bar is in  $\mu\text{m}$ .

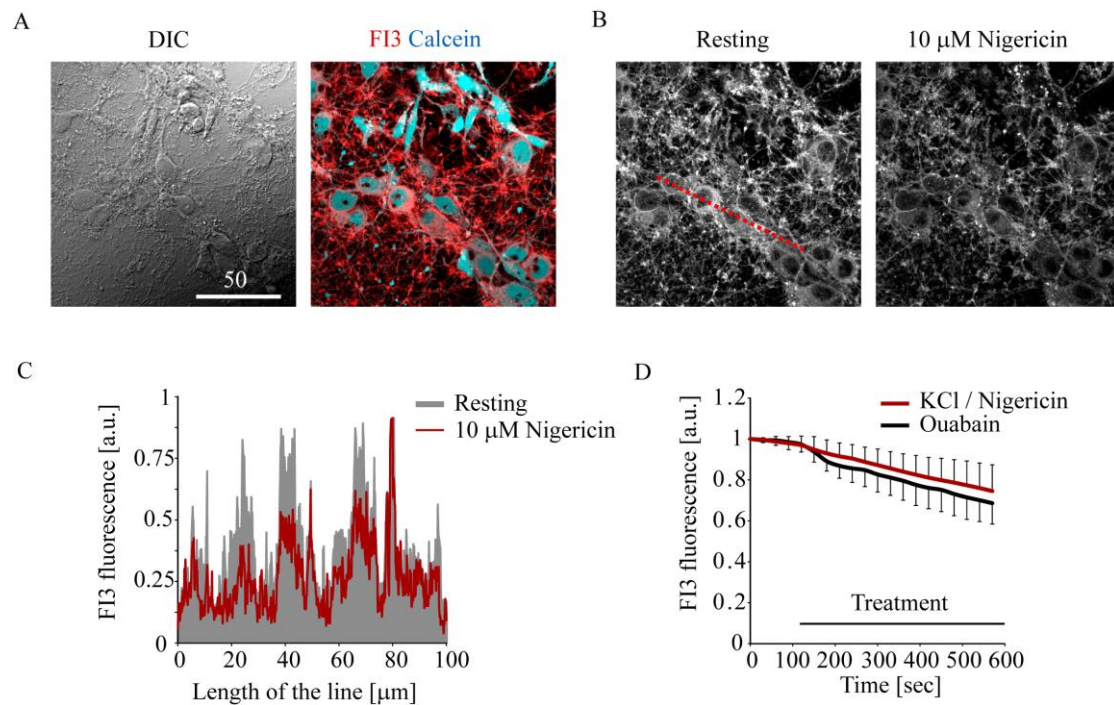

**Figure S9. Stimulation of rat primary neural cells with ouabain and nigericin.** Live cells were stained with FI3 (10  $\mu\text{g}/\text{ml}$ , 16 h), counter-stained with Calcein Green and imaged. A: Representative image of cells shown as transmission light (DIC) and fluorescence (FI3 in red, Calcein Green in blue). Images represent stacks of 2 (DIC) or 3 (fluorescence) focal planes (0.5  $\mu\text{m}$ ). B: Examples of decrease in intracellular FI3 fluorescence upon addition of nigericin (10  $\mu\text{M}$ , 7 min) in the presence of 20 mM KCl. C: Representative line profile analysis of the response to nigericin (dotted line is shown in B). D: Calculated reduction of intracellular FI3 fluorescence upon treatment of cells with nigericin (10  $\mu\text{M}$ ) and ouabain (50  $\mu\text{M}$ ). Scale bar is in  $\mu\text{m}$ .



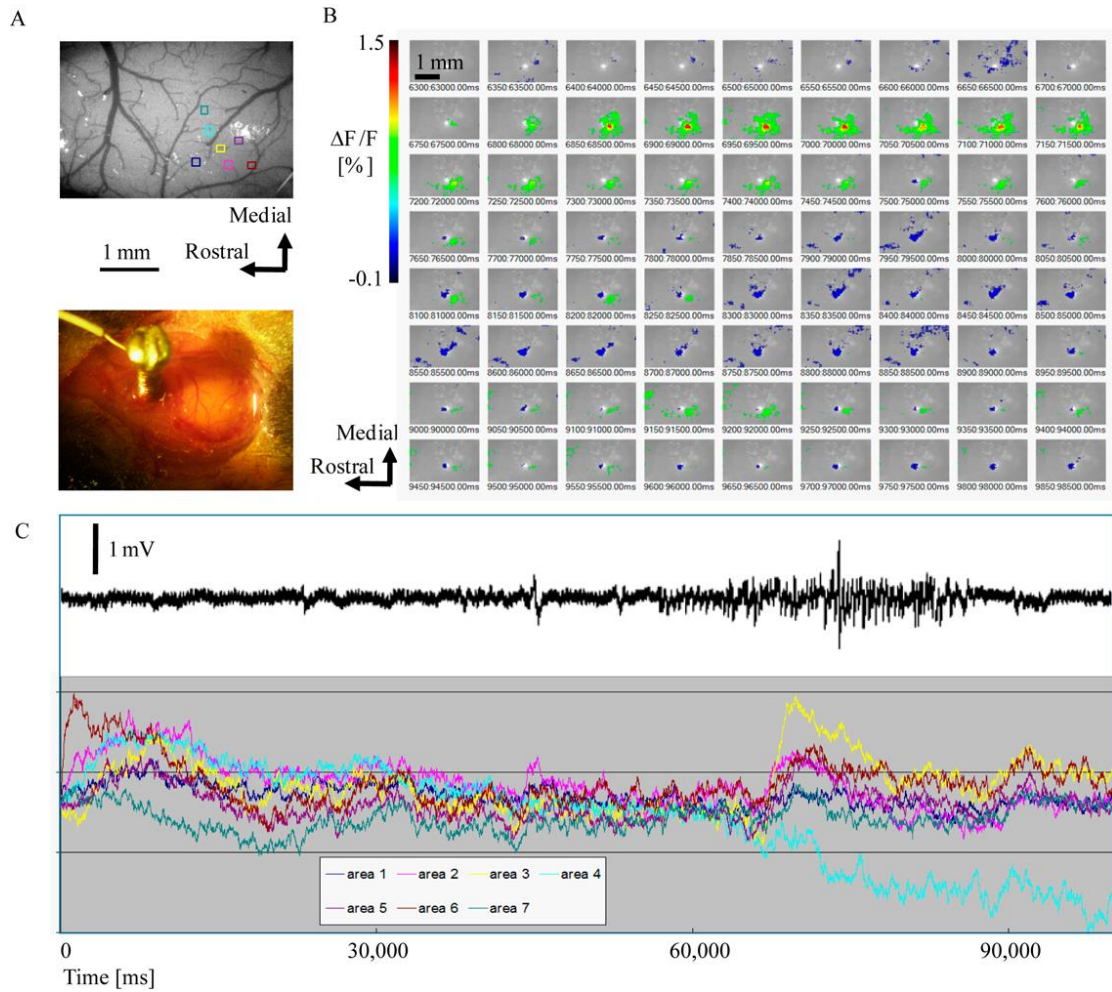

**Figure S10. *In vivo* brain imaging of responses to epileptic seizures with FI3 nanoparticles.** A: Region of imaging, with locations of ROI, where fluorescence was calculated. Bottom: photo of operated area (cranial window) with the screw-type electrode connected for the EEG. B: Pseudocolor images of the cortex before and after stimulus onset. C: calculated the epileptic seizures on the EEG (top) and the integrated fluorescence signal in the indicated ROI (bottom).
